# Supplementary material
Source: Research Square preprint supplement (doi:10.21203/rs.3.rs-9853026/v1)
Supplement: Supplementary file 1 [file 57a1c2418f75bfbccc4e836e.xlsx]

## Sheet: Tabelle1
Symbol	baseMean	log2FoldChange	lfcSE	stat	pvalue	padj
G6pc2	22400	13.3	0.516	-25.8	5.53e-147	6.54e-143
Icosl	12900	3.83	0.152	-25.2	1.19e-139	7.03e-136
1810043G02Rik	3580	4.16	0.267	-15.6	9.67e-55	3.81e-51
Aire	2050	4.92	0.317	-15.5	2.29e-54	6.76e-51
Coro2a	617	5.95	0.658	-9.04	1.54e-19	3.63e-16
Pfkl	26600	3.67	0.513	-7.16	8.21e-13	1.62e-09
Brip1	151	-6.41	0.932	6.88	6.03e-12	1.02e-08
Zfp763	119	-10.3	1.71	6.05	1.43e-09	2.11e-06
S100a8	178	4.18	0.693	-6.03	1.62e-09	2.14e-06
Il21r	96.2	-10	1.77	5.67	1.4e-08	1.66e-05
Rsrp1	11000	0.813	0.147	-5.55	2.93e-08	3.16e-05
Zfp418	79.9	-9.76	1.86	5.24	1.64e-07	0.000161
Arvcf	112	-8.8	1.69	5.19	2.08e-07	0.000189
Ctnnal1	76.8	-9.7	1.91	5.09	3.65e-07	0.000308
Pigr	68.8	-9.54	1.89	5.05	4.36e-07	0.000344
Man1a	5600	1.01	0.203	-4.99	5.99e-07	0.000443
Ccnd2	32500	0.665	0.137	-4.86	1.2e-06	0.000834
Ttc26	91.2	-5.16	1.07	4.84	1.31e-06	0.000863
Prag1	1140	-1.4	0.293	4.76	1.97e-06	0.00118
Sgk1	139	-5.8	1.22	4.74	2.09e-06	0.00118
Cltc	13400	-0.536	0.113	4.75	2.06e-06	0.00118
S100a9	260	3.15	0.667	-4.73	2.23e-06	0.0012
Napsa	1570	1.16	0.248	-4.67	3.04e-06	0.00156
Lnx2	859	-1.42	0.308	4.62	3.77e-06	0.00179
Zfp773	57.5	-9.28	2	4.63	3.63e-06	0.00179
Ptpn22	4330	-0.761	0.165	4.61	4.06e-06	0.00185
Kit	5590	-0.851	0.187	4.56	5.21e-06	0.00228
Slpi	59700	0.843	0.186	-4.54	5.5e-06	0.00232
Ngp	184	3.32	0.737	-4.5	6.75e-06	0.00276
Dnmt3l	142	3.98	0.902	-4.41	1.05e-05	0.00416
Ints4	2160	-1	0.228	4.4	1.1e-05	0.0042
Cxcl12	48.7	-9.05	2.07	4.38	1.19e-05	0.00442
Ifit1	67	-9.5	2.18	4.36	1.32e-05	0.00472
Cenpe	48.1	-9.03	2.08	4.34	1.42e-05	0.00496
Tmtc4	1890	-1.04	0.24	4.32	1.53e-05	0.00517
Usp44	62.6	6.96	1.61	-4.31	1.62e-05	0.00523
Cdc42ep4	45.8	-8.96	2.08	4.31	1.63e-05	0.00523
Limd2	2800	0.839	0.2	-4.2	2.63e-05	0.00809
Osbpl1a	96.3	-5.78	1.38	4.2	2.67e-05	0.00809
Nudt13	239	-2.53	0.611	4.14	3.46e-05	0.0102
Chd2	1640	-1	0.243	4.13	3.58e-05	0.0103
Pik3r3	41.3	-8.81	2.14	4.12	3.73e-05	0.0105
Myo7a	60.7	-7.91	1.93	4.09	4.27e-05	0.0118
Camkk1	54.8	-7.77	1.91	4.07	4.8e-05	0.0129
Sell	1690	-1.07	0.265	4.03	5.65e-05	0.0143
Prdm1	12700	-0.704	0.175	4.03	5.67e-05	0.0143
Tcf3	3030	0.744	0.185	-4.03	5.5e-05	0.0143
Txnip	12300	0.453	0.113	-4	6.39e-05	0.0157
Tjp2	78.4	-4.11	1.03	3.99	6.54e-05	0.0158
Mob3b	55.7	-6.76	1.72	3.94	8.29e-05	0.0182
Stx2	89.7	4.62	1.17	-3.94	8.3e-05	0.0182
Armc2	41.3	-8.81	2.23	3.95	7.81e-05	0.0182
Zfp748	466	-2.58	0.655	3.94	8.01e-05	0.0182
Wbp1l	3180	-0.676	0.171	3.95	7.84e-05	0.0182
Thbd	4160	-0.926	0.236	3.93	8.53e-05	0.0183
Swap70	10800	-0.482	0.123	3.91	9.11e-05	0.0193
Cd200r1	36.5	-8.63	2.21	3.9	9.75e-05	0.0202
Aldh1b1	38.4	8.73	2.25	-3.89	0.000102	0.0207
Zwilch	36.2	-8.62	2.22	3.88	0.000105	0.0207
Gpr15	37.2	8.69	2.24	-3.88	0.000103	0.0207
Foxm1	88.7	-3.78	0.98	3.86	0.000115	0.0209
Fam196b	36.3	-8.62	2.23	3.87	0.00011	0.0209
Slc39a9	2830	-0.919	0.238	3.86	0.000115	0.0209
Ttc8	49.6	-6.63	1.72	3.86	0.000114	0.0209
Bbs1	51.8	-7.69	1.99	3.87	0.00011	0.0209
Btla	2460	-0.817	0.212	3.85	0.000118	0.0212
Scd2	11700	-0.521	0.136	3.84	0.000123	0.0218
Igfn1	35.5	-8.59	2.24	3.83	0.000126	0.0219
Ccdc141	40.2	-8.77	2.3	3.82	0.000134	0.0229
Zfp976	35.3	-8.58	2.25	3.82	0.000135	0.0229
Pds5b	1130	-1.08	0.284	3.81	0.000141	0.0235
Ifi44	47.8	-6.58	1.73	3.8	0.000145	0.0235
Trp53inp1	36100	-0.573	0.151	3.8	0.000144	0.0235
Shprh	725	-1.34	0.354	3.79	0.000148	0.0236
Grhl3	34.2	-8.54	2.26	3.78	0.000155	0.0243
Slc25a47	41.6	-6.36	1.68	3.78	0.000156	0.0243
Omp	48	-6.55	1.73	3.78	0.000158	0.0243
Rxra	36.6	-8.63	2.31	3.74	0.000186	0.0282
Pyroxd2	74.5	-5.4	1.45	3.72	0.000203	0.0304
Eif3b	4200	0.752	0.203	-3.7	0.000213	0.0316
Fgl2	198	4.12	1.11	-3.69	0.000221	0.0322
Hnrnpu	4290	0.724	0.196	-3.69	0.000227	0.0327
Ube2v2	85.3	-3.65	0.999	3.65	0.000262	0.0373
Fam161a	32.3	-8.45	2.32	3.64	0.000275	0.0388
Hmg20a	1220	-0.971	0.267	3.63	0.000281	0.0388
Txndc11	5440	0.654	0.18	-3.63	0.000282	0.0388
Epha1	44	-6.42	1.78	3.61	0.000303	0.0413
Prr11	58.9	-4.48	1.24	3.61	0.00031	0.0417
Apbb2	73.4	-5.32	1.48	3.59	0.000334	0.0429
Cirbp	3640	-0.62	0.173	3.59	0.00033	0.0429
Nfe2l1	6960	-0.567	0.158	3.59	0.000326	0.0429
Dennd6a	2490	-0.754	0.21	3.59	0.000331	0.0429
Utp20	504	-1.45	0.405	3.57	0.00035	0.0446
Zbtb49	384	-1.87	0.524	3.57	0.00036	0.0453
Igf1	32.3	-8.45	2.37	3.56	0.000372	0.0463
Ralgps2	5890	-0.55	0.156	3.54	0.000405	0.0499
Lrrc28	666	-1.3	0.371	3.51	0.000453	0.0553
Mex3c	129	3.07	0.876	-3.5	0.000458	0.0553
Lrrc39	47.1	-5.92	1.69	3.5	0.000463	0.0554
Cxadr	32.5	-8.46	2.42	3.5	0.000474	0.056
Zfp109	41	-6.36	1.82	3.49	0.000486	0.0564
Mon2	963	1.01	0.29	-3.49	0.000484	0.0564
Ext1	75	-3.65	1.05	3.48	0.00051	0.0586
Gatm	28.9	-8.29	2.39	3.47	0.000515	0.0586
Sptlc1	1580	-0.798	0.23	3.47	0.000523	0.059
H2-M10.1	33.1	-8.49	2.45	3.46	0.000531	0.0593
Kcnh2	28.2	-8.25	2.41	3.43	0.000614	0.0667
Tcf20	379	1.76	0.514	-3.43	0.000608	0.0667
Ppl	27.9	-8.24	2.4	3.43	0.000609	0.0667
ENSMUSG00000063895	1010	-0.991	0.29	3.42	0.000621	0.0669
Klhl26	752	-1.35	0.394	3.41	0.000641	0.0683
Lrrc59	5740	0.512	0.15	-3.41	0.000646	0.0683
Aldh1a2	271	2.07	0.611	-3.4	0.000677	0.0703
Lipo3	613	-1.55	0.455	3.4	0.000676	0.0703
Kpna4	560	1.39	0.41	-3.39	0.000693	0.0707
Ltb	15600	0.544	0.16	-3.39	0.000693	0.0707
Mzt1	1120	-0.981	0.291	3.37	0.000745	0.0754
Tspyl4	251	-2.46	0.734	3.36	0.000787	0.0782
Recql4	26.9	-8.19	2.44	3.36	0.000781	0.0782
Trpc4ap	5210	0.591	0.177	-3.34	0.000838	0.0819
Foxred2	401	1.96	0.587	-3.34	0.000836	0.0819
Xrn2	3070	-0.638	0.191	3.33	0.000862	0.083
Mgat2	2960	0.928	0.278	-3.33	0.000857	0.083
Fam213a	27.7	-8.23	2.48	3.32	0.000909	0.0867
Rnpep	914	0.978	0.295	-3.31	0.000929	0.0873
AU040320	3230	-0.641	0.193	3.31	0.000924	0.0873
Pms1	397	1.46	0.442	-3.3	0.000962	0.0896
Srsf1	3300	0.631	0.191	-3.3	0.000969	0.0896
Mbd5	184	-2.37	0.721	3.29	0.000999	0.0917
Lefty1	25.3	8.13	2.48	-3.28	0.00104	0.0946
Wls	1820	-0.73	0.223	3.28	0.00105	0.0947
Sema3b	28.7	-8.28	2.53	3.28	0.00106	0.0947
Jup	25.4	-8.1	2.48	3.27	0.00108	0.0957
Galnt11	532	1.43	0.438	-3.26	0.0011	0.0974
Ngdn	2310	0.675	0.207	-3.26	0.00112	0.098
