# Supplementary material
Source: Research Square preprint supplement (doi:10.21203/rs.3.rs-9853026/v1)

# Unprocessed original images

## Figure 1a thymus, single Z-slices and isolated channels

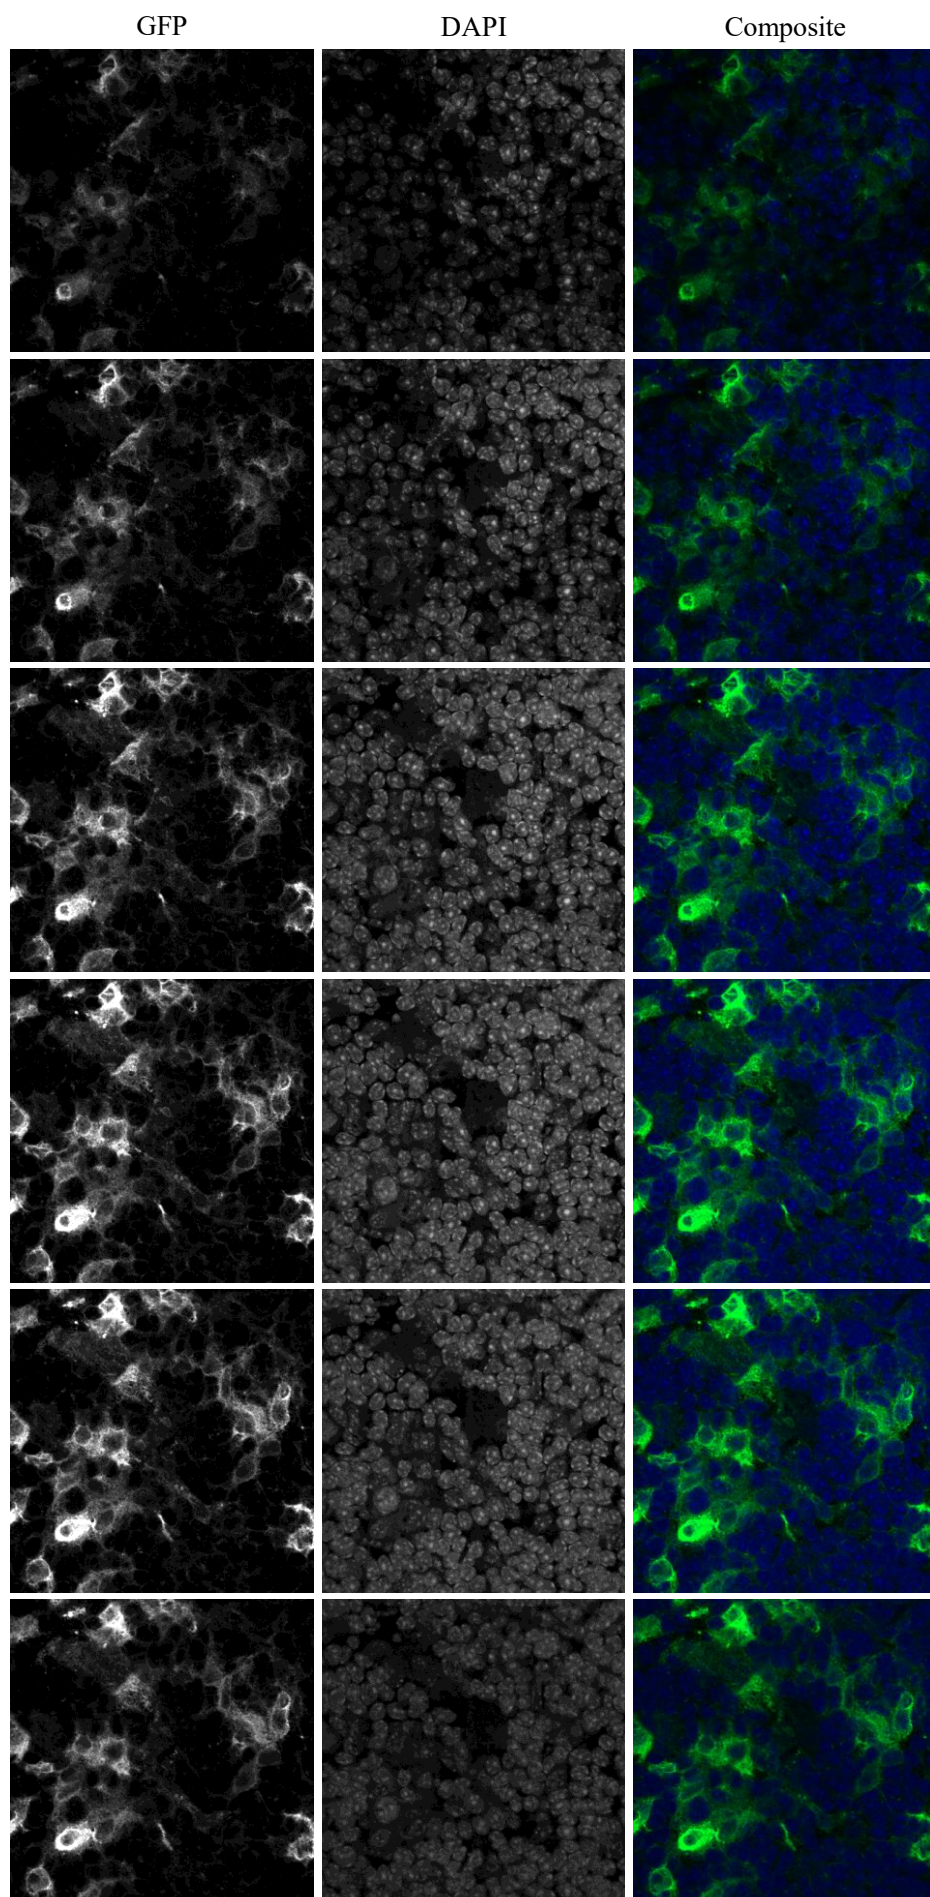

Figure 1a bone marrow, single Z-slices and isolated channels

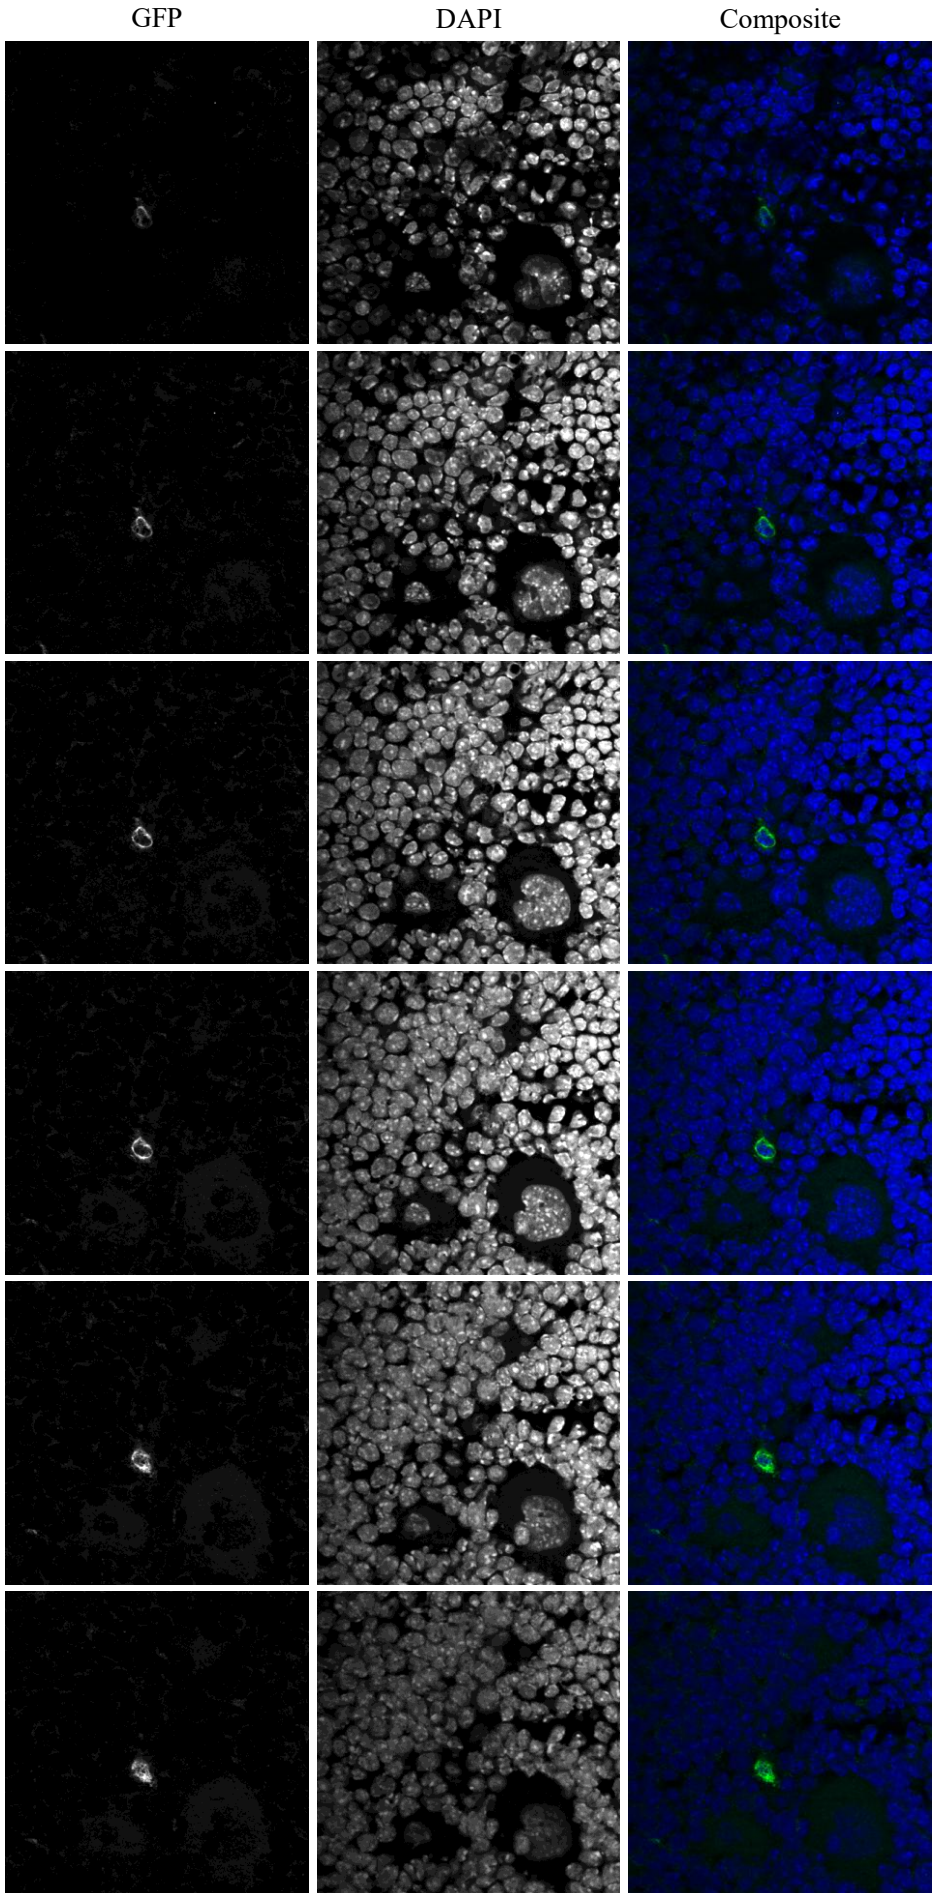

Figure 1c

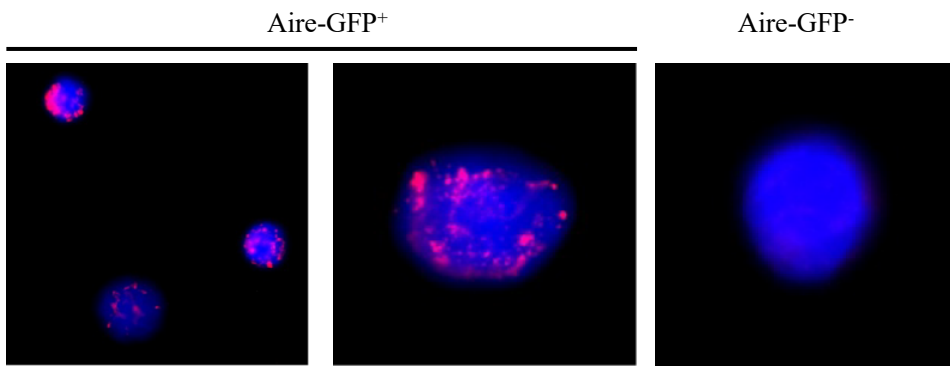

Figure 1d, uncut images

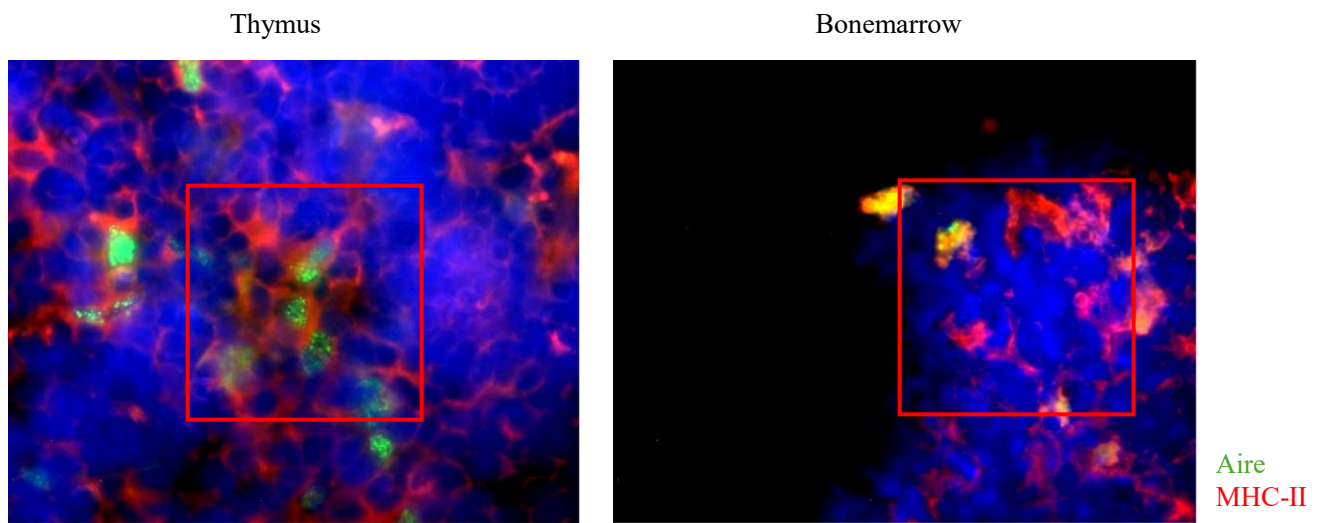

Figure 4b, single Z-slices and isolated channels, Aire + CD4-1

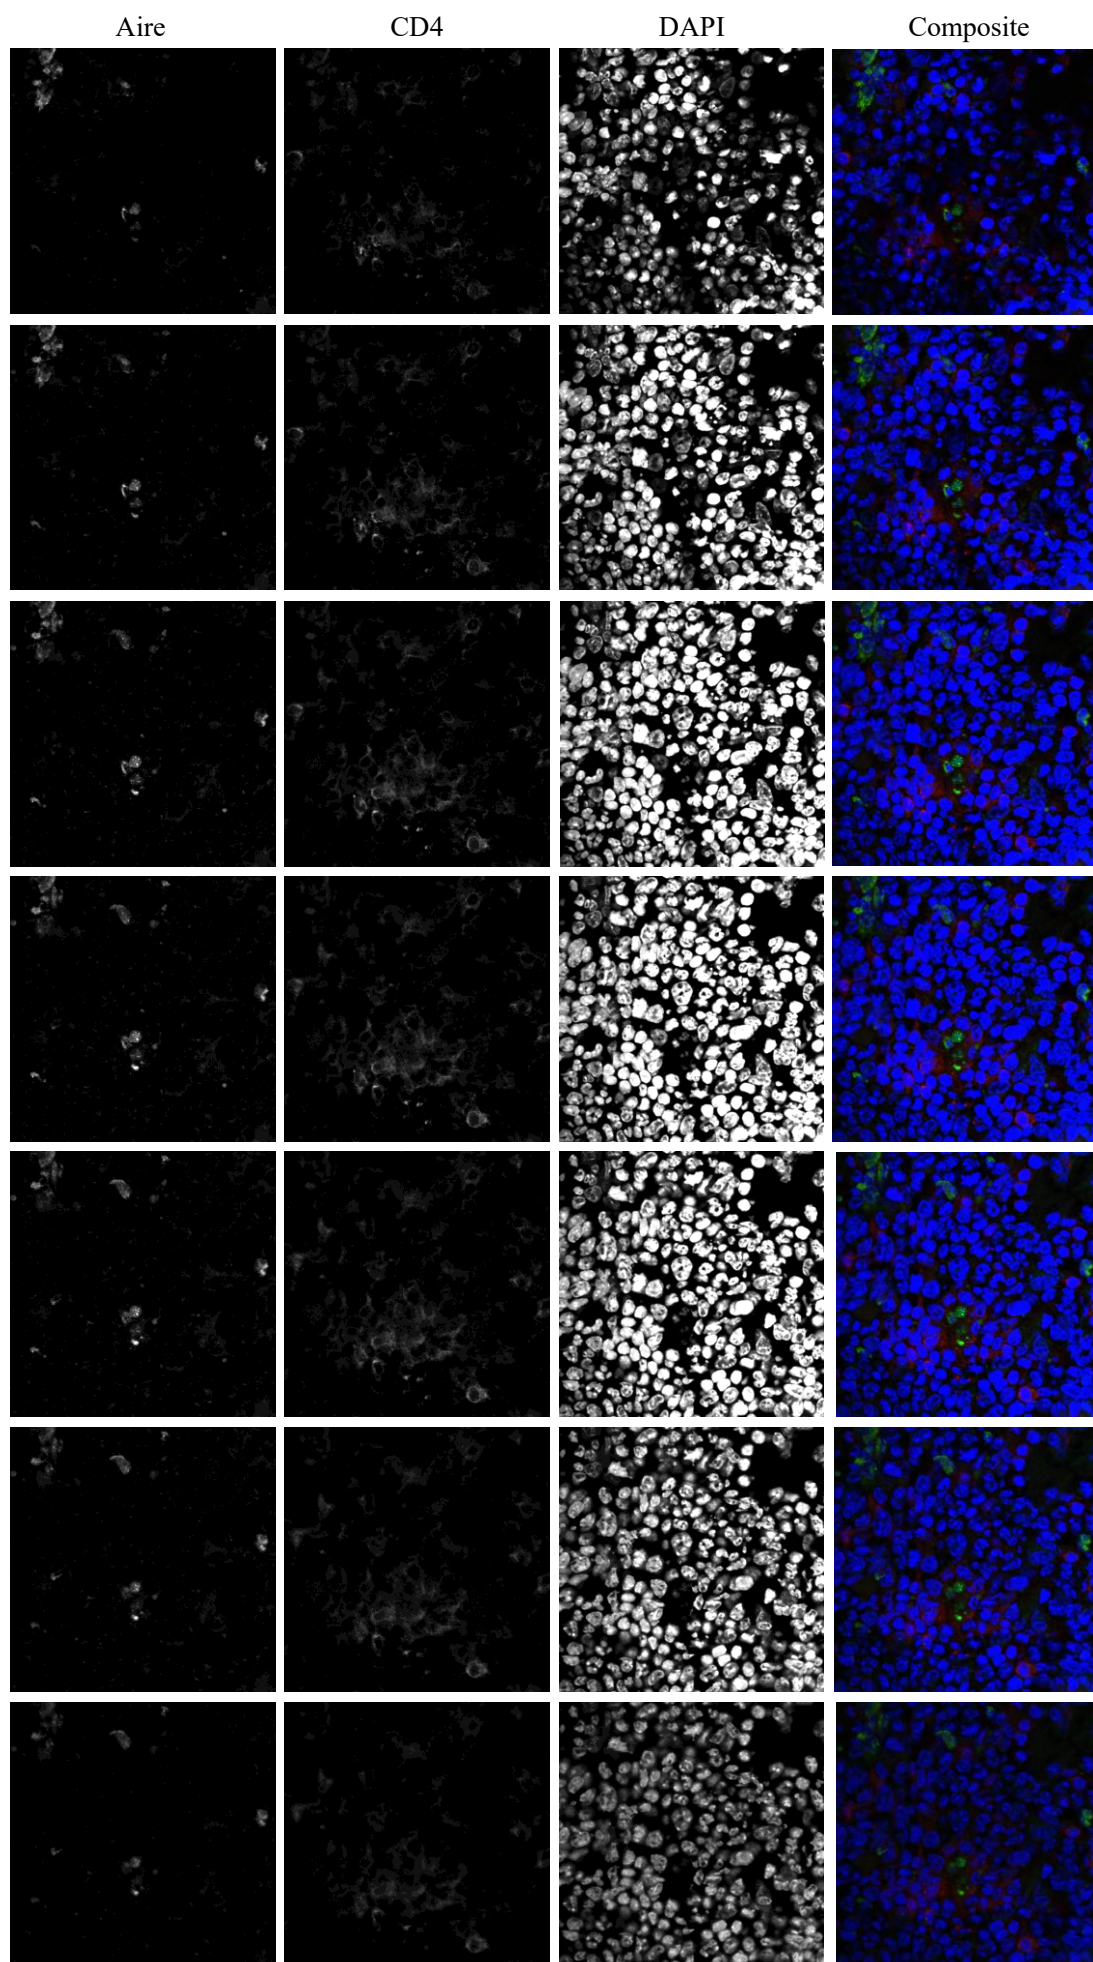

Figure 4b, single Z-slices and isolated channels, Aire + CD4-2

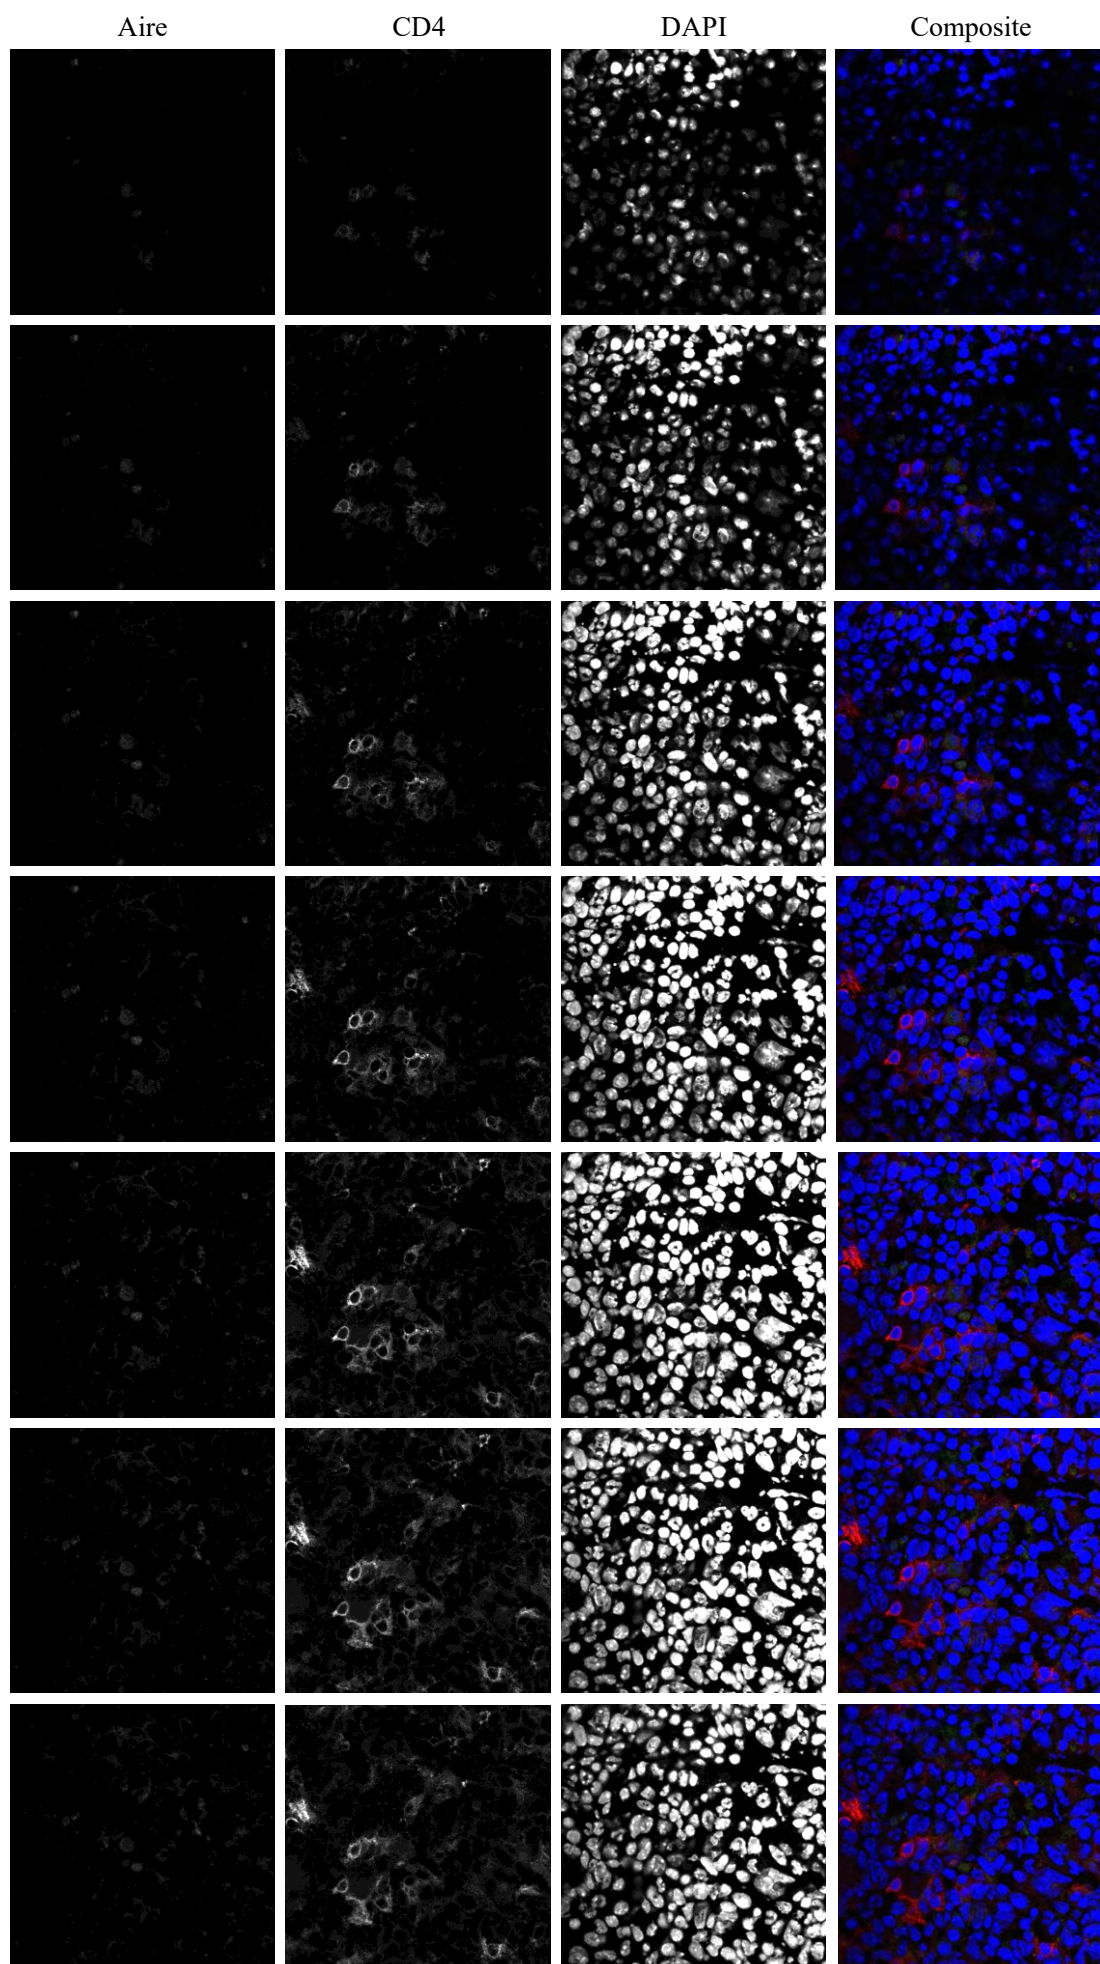

Figure 4b, single Z-slices and isolated channels, Aire + CD8

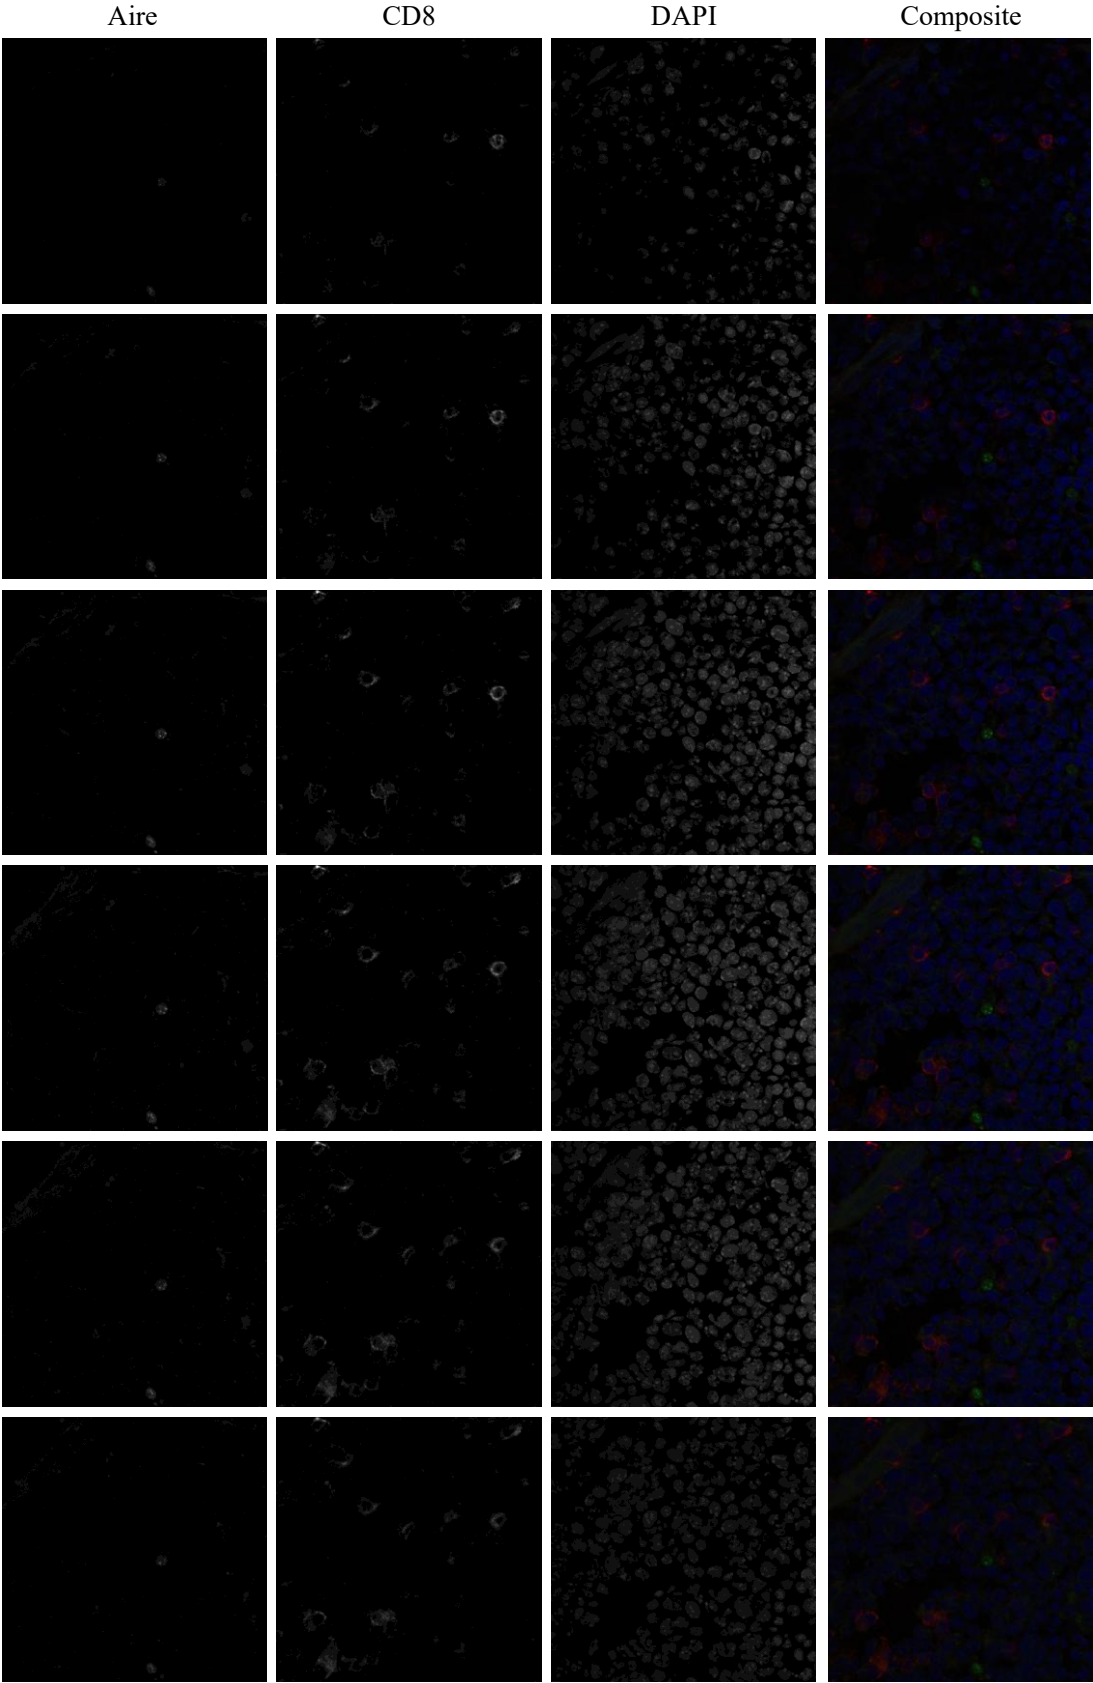

Figure 4b, isolated channels, Aire + CD19

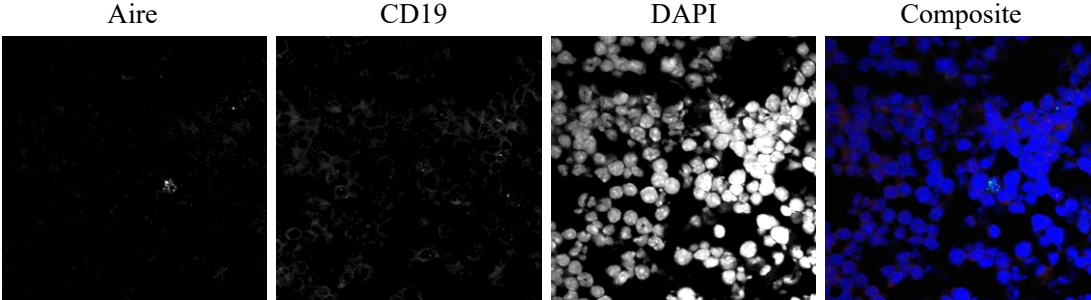

Supplement: Supplementary file 2 [file 97677ae229054c9ec8ba4470.pdf]
