# Supplementary material
Source: Research Square preprint supplement (doi:10.21203/rs.3.rs-9853026/v1)
Supplement: Supplementary file 2 [file b6280e998fabc2bae2983056.xlsx]

## Sheet: Tabelle1
Symbol	Zscore_1	Detection p-value_1	Zscore_2	Detection p-value_2	Zscore_3	Detection p-value_3
Pou2af1	964520	< 0.001	1163446	< 0.001	1317940	< 0.001
S100a9	872636	< 0.001	722314	< 0.001	793904	< 0.001
Rchy1	608804	< 0.001	719638	< 0.001	660340	< 0.001
Chka	568431	< 0.001	488931	< 0.001	525483	< 0.001
Laptm5	528985	< 0.001	425392	< 0.001	501537	< 0.001
Psap	473690	< 0.001	554911	< 0.001	465588	< 0.001
Ehd4	455818	< 0.001	511251	< 0.001	522538	< 0.001
Rps21	391737	< 0.001	313096	< 0.001	429345	< 0.001
Camp	368281	< 0.001	419757	< 0.001	399007	< 0.001
Serinc3	363372	< 0.001	437708	< 0.001	388818	< 0.001
S100a8	308718	< 0.001	354141	< 0.001	387043	< 0.001
Atp5b	291027	< 0.001	216072	< 0.001	264728	< 0.001
Ssr4	288497	< 0.001	220812	< 0.001	304164	< 0.001
Slpi	283163	< 0.001	207450	< 0.001	306148	< 0.001
Ngp	280256	< 0.001	338341	< 0.001	297266	< 0.001
Gars	274162	< 0.001	357088	< 0.001	363255	< 0.001
Hdc	262865	< 0.001	306560	< 0.001	309026	< 0.001
Sec11c	261900	< 0.001	232455	< 0.001	267034	< 0.001
Ndufv2	260762	< 0.001	211153	< 0.001	198009	< 0.001
Creld2	259222	< 0.001	350277	< 0.001	236350	< 0.001
Npc2	257716	< 0.001	206285	< 0.001	192431	< 0.001
Pttg1ip	255546	< 0.001	219348	< 0.001	293442	< 0.001
St6gal1	249705	< 0.001	287090	< 0.001	262265	< 0.001
2610039C10Rik	249641	< 0.001	177134	< 0.001	298837	< 0.001
Gja1	245940	< 0.001	222698	< 0.001	112890	< 0.001
Klf6	241820	< 0.001	285228	< 0.001	228281	< 0.001
Smarcd2	229387	< 0.001	166058	< 0.001	185145	< 0.001
Etfb	227747	< 0.001	223973	< 0.001	212883	< 0.001
Atp2a3	227291	< 0.001	257099	< 0.001	229286	< 0.001
Mat2a	226044	< 0.001	201072	< 0.001	161917	< 0.001
E2f2	222761	< 0.001	134604	< 0.001	191098	< 0.001
Atp5j2	219399	< 0.001	228955	< 0.001	266468	< 0.001
Prg2	216494	< 0.001	448094	< 0.001	317849	< 0.001
Cox6c	212730	< 0.001	211890	< 0.001	218298	< 0.001
Mmp9	209042	< 0.001	198581	< 0.001	103097	< 0.001
Txndc5	208927	< 0.001	250712	< 0.001	230206	< 0.001
Ift20	208497	< 0.001	234495	< 0.001	198499	< 0.001
Slc4a1	205518	< 0.001	532267	< 0.001	206736	< 0.001
Sap30l	203502	< 0.001	220550	< 0.001	194434	< 0.001
Chst1	200503	< 0.001	231197	< 0.001	198524	< 0.001
2310003F16Rik	198793	< 0.001	182078	< 0.001	264384	< 0.001
Mcm4	198451	< 0.001	197134	< 0.001	200907	< 0.001
Nsmce2	196648	< 0.001	135025	< 0.001	118950	< 0.001
Skap2	192815	< 0.001	197237	< 0.001	180876	< 0.001
Col5a1	190704	< 0.001	89854	< 0.001	33281	< 0.001
Pole3	188975	< 0.001	82382	< 0.001	194591	< 0.001
Diablo	187857	< 0.001	66181	< 0.001	51612	< 0.001
Slc9a3r1	187215	< 0.001	220239	< 0.001	158278	< 0.001
Tram1	186709	< 0.001	231262	< 0.001	210454	< 0.001
Aatk	186547	< 0.001	295395	< 0.001	224678	< 0.001
Reln	185099	< 0.001	134172	< 0.001	122048	< 0.001
Serf2	183072	< 0.001	149982	< 0.001	140069	< 0.001
Srp14	172248	< 0.001	206173	< 0.001	133462	< 0.001
Plrg1	169616	< 0.001	120400	< 0.001	203125	< 0.001
Park7	167549	< 0.001	214069	< 0.001	208352	< 0.001
Tyrobp	157583	< 0.001	151652	< 0.001	145573	< 0.001
Nup93	154890	< 0.001	124218	< 0.001	89448	< 0.001
Sfrs1	154231	< 0.001	139439	< 0.001	107332	< 0.001
Rsph1	153619	< 0.001	151304	< 0.001	73614	< 0.001
Adam17	153573	< 0.001	106290	< 0.001	149364	< 0.001
Htatsf1	151793	< 0.001	95012	< 0.001	117589	< 0.001
Mpo	148074	< 0.001	242596	< 0.001	193111	< 0.001
Hspa5	144374	< 0.001	181605	< 0.001	130900	< 0.001
Cd164	143888	< 0.001	160910	< 0.001	193027	< 0.001
Fnta	142554	< 0.001	256097	< 0.001	199227	< 0.001
Krtcap2	134086	< 0.001	254175	< 0.001	145744	< 0.001
Acly	133936	< 0.001	97953	< 0.001	176054	< 0.001
Tyrp1	133313	< 0.001	171057	< 0.001	155685	< 0.001
Hspa9	128731	< 0.001	78013	< 0.001	55975	< 0.001
Msh6	127911	< 0.001	111381	< 0.001	151245	< 0.001
Ccng1	127327	< 0.001	75865	< 0.001	83964	< 0.001
Cdk5r1	126392	< 0.001	55368	< 0.001	85395	< 0.001
H3f3b	125266	< 0.001	128541	< 0.001	136043	< 0.001
Ptp4a2	124707	< 0.001	131102	< 0.001	122227	< 0.001
Tmbim4	122592	< 0.001	148872	< 0.001	122634	< 0.001
Rrm2	121282	< 0.001	162318	< 0.001	134911	< 0.001
2310001A20Rik	120991	< 0.001	184442	< 0.001	160895	< 0.001
Idh3g	120512	< 0.001	65971	< 0.001	52143	< 0.001
Ubp1	120296	< 0.001	58262	< 0.001	72389	< 0.001
Chi3l3	119832	< 0.001	143383	< 0.001	172656	< 0.001
Hist1h1c	118185	< 0.001	148383	< 0.001	121135	< 0.001
Snx11	117417	< 0.001	119712	< 0.001	102978	< 0.001
Dnajc19	116907	< 0.001	81703	< 0.001	87423	< 0.001
Max	115817	< 0.001	142580	< 0.001	117308	< 0.001
Lamp1	114597	< 0.001	135928	< 0.001	144695	< 0.001
Arpc1b	113441	< 0.001	125687	< 0.001	121562	< 0.001
Sh3bgrl3	113381	< 0.001	213846	< 0.001	123838	< 0.001
Atp5e	112835	< 0.001	74630	< 0.001	97553	< 0.001
Ibtk	112259	< 0.001	127149	< 0.001	101103	< 0.001
Cdv3	111596	< 0.001	126700	< 0.001	112909	< 0.001
Ivns1abp	111057	< 0.001	101785	< 0.001	85618	< 0.001
Pip4k2a	110389	< 0.001	245454	< 0.001	64145	< 0.001
Gpx1	109772	< 0.001	187542	< 0.001	110144	< 0.001
Lmo2	108710	< 0.001	135692	< 0.001	148009	< 0.001
Acss1	107704	< 0.001	127485	< 0.001	132655	< 0.001
Dynlt3	106361	< 0.001	63739	< 0.001	133986	< 0.001
Gcap14	105803	< 0.001	74070	< 0.001	88891	< 0.001
1100001G20Rik	105751	< 0.001	99883	< 0.001	94123	< 0.001
Prpf6	105183	< 0.001	154500	< 0.001	95799	< 0.001
Ranbp1	103097	< 0.001	106789	< 0.001	101235	< 0.001
Yeats4	101330	< 0.001	147010	< 0.001	117889	< 0.001
Laptm4a	100777	< 0.001	137686	< 0.001	145809	< 0.001
Hspa2	100437	< 0.001	103617	< 0.001	103429	< 0.001
Sar1b	97224	< 0.001	139742	< 0.001	62067	< 0.001
Akr1a4	96502	< 0.001	62473	< 0.001	74033	< 0.001
Ahctf1	96377	< 0.001	37031	< 0.001	14720	< 0.001
Cd79b	94535	< 0.001	69083	< 0.001	86433	< 0.001
Ctnna1	93412	< 0.001	67168	< 0.001	54146	< 0.001
Ddx3x	92957	< 0.001	124428	< 0.001	124755	< 0.001
Ppp3ca	92586	< 0.001	88616	< 0.001	113375	< 0.001
P4hb	92248	< 0.001	113805	< 0.001	102254	< 0.001
Fxyd5	92193	< 0.001	54617	< 0.001	55561	< 0.001
Atp1a1	91637	< 0.001	73939	< 0.001	90022	< 0.001
Hat1	90861	< 0.001	119607	< 0.001	90445	< 0.001
Tesk1	88981	< 0.001	31957	< 0.001	36597	< 0.001
Dazap2	88964	< 0.001	115062	< 0.001	118512	< 0.001
Pkm2	88451	< 0.001	93641	< 0.001	86670	< 0.001
Tctex1d2	88149	< 0.001	15911	< 0.001	52048	< 0.001
Rrm1	87810	< 0.001	85204	< 0.001	147186	< 0.001
Cstb	87374	< 0.001	35916	< 0.001	47569	< 0.001
Pptc7	87124	< 0.001	44464	< 0.001	86447	< 0.001
Ccnd3	86866	< 0.001	52253	< 0.001	108512	< 0.001
Lrg1	86691	< 0.001	29553	< 0.001	35206	< 0.001
Aaas	86330	< 0.001	140296	< 0.001	72158	< 0.001
Oosp1	86286	< 0.001	89745	< 0.001	117257	< 0.001
Rb1	86034	< 0.001	17589	< 0.001	53610	< 0.001
Rps7	85793	< 0.001	83220	< 0.001	64063	< 0.001
Eef1b2	85015	< 0.001	65256	< 0.001	104410	< 0.001
Satb1	84893	< 0.001	84587	< 0.001	106831	< 0.001
H2afx	84873	< 0.001	143241	< 0.001	123261	< 0.001
Herpud1	84396	< 0.001	94150	< 0.001	85443	< 0.001
Prdx4	83698	< 0.001	146526	< 0.001	115774	< 0.001
Ormdl3	83628	< 0.001	51629	< 0.001	61634	< 0.001
Snn	82929	< 0.001	80966	< 0.001	133431	< 0.001
Atp5g3	82656	< 0.001	73668	< 0.001	82217	< 0.001
Tmem109	82631	< 0.001	209648	< 0.001	223947	< 0.001
Aprt	81819	< 0.001	83665	< 0.001	80905	< 0.001
Anapc4	81675	< 0.001	65846	< 0.001	75161	< 0.001
Arl8b	81612	< 0.001	37355	< 0.001	195765	< 0.001
Cxcr4	81576	< 0.001	88992	< 0.001	88169	< 0.001
Cfp	80962	< 0.001	74613	< 0.001	39264	< 0.001
Uqcrc1	79464	< 0.001	68010	< 0.001	76575	< 0.001
Sgpp1	78872	< 0.001	81755	< 0.001	103984	< 0.001
Cep63	78815	< 0.001	143373	< 0.001	63998	< 0.001
Zfp574	78216	< 0.001	30801	< 0.001	85235	< 0.001
Ccndbp1	78102	< 0.001	20524	< 0.001	62388	< 0.001
Btg2	77518	< 0.001	104404	< 0.001	95600	< 0.001
Suz12	76444	< 0.001	68015	< 0.001	97204	< 0.001
Degs1	76319	< 0.001	69319	< 0.001	90798	< 0.001
Oat	75910	< 0.001	121065	< 0.001	75437	< 0.001
Kctd10	75264	< 0.001	106326	< 0.001	83604	< 0.001
Glb1	75123	< 0.001	78081	< 0.001	76888	< 0.001
Lamp2	74673	< 0.001	73009	< 0.001	74720	< 0.001
Cdca7	74173	< 0.001	135934	< 0.001	100803	< 0.001
BC028528	72346	< 0.001	30538	< 0.001	31893	< 0.001
Uqcrc2	72138	< 0.001	82197	< 0.001	53339	< 0.001
Ptpn6	72004	< 0.001	71546	< 0.001	34961	< 0.001
Casp1	71836	< 0.001	19858	< 0.001	60023	< 0.001
Napsa	71569	< 0.001	44348	< 0.001	47281	< 0.001
Fpr2	71211	< 0.001	112570	< 0.001	86123	< 0.001
Cct3	70782	< 0.001	68282	< 0.001	76147	< 0.001
Cybasc3	70718	< 0.001	38333	< 0.001	51352	< 0.001
Emg1	69859	< 0.001	72358	< 0.001	70103	< 0.001
Slc39a6	69613	< 0.001	74470	< 0.001	139796	< 0.001
Pglyrp1	69566	< 0.001	150146	< 0.001	115042	< 0.001
Ubac1	68996	< 0.001	64235	< 0.001	41604	< 0.001
Ctse	68603	< 0.001	50509	< 0.001	85535	< 0.001
Atp6v1b2	68592	< 0.001	132129	< 0.001	75970	< 0.001
Snx1	67627	< 0.001	122902	< 0.001	53579	< 0.001
Srd5a3	66864	< 0.001	40804	< 0.001	31508	< 0.001
Fchsd2	66551	< 0.001	26790	< 0.001	37510	< 0.001
AI467606	66257	< 0.001	90440	< 0.001	92725	< 0.001
Sepp1	66236	< 0.001	48566	< 0.001	74517	< 0.001
Adssl1	66143	< 0.001	30303	< 0.001	53512	< 0.001
Endod1	65904	< 0.001	48353	< 0.001	90044	< 0.001
Prps1	65850	< 0.001	49971	< 0.001	71629	< 0.001
Pmpcb	65662	< 0.001	52477	< 0.001	52798	< 0.001
Nudt19	64892	< 0.001	55871	< 0.001	43261	< 0.001
Kcnab2	64700	< 0.001	143795	< 0.001	71393	< 0.001
Lass5	63404	< 0.001	34210	< 0.001	53613	< 0.001
Tapt1	62553	< 0.001	63561	< 0.001	67707	< 0.001
Ctage5	62226	< 0.001	21350	< 0.001	82336	< 0.001
Ly6c1	61206	< 0.001	95572	< 0.001	93379	< 0.001
Ostf1	60996	< 0.001	128123	< 0.001	62992	< 0.001
Ikzf1	60829	< 0.001	31909	< 0.001	25934	< 0.001
Sepw1	60065	< 0.001	136610	< 0.001	68729	< 0.001
Cox5a	59806	< 0.001	86836	< 0.001	69815	< 0.001
G6pdx	59227	< 0.001	40070	< 0.001	69101	< 0.001
Rnf166	59112	< 0.001	59978	< 0.001	51122	< 0.001
Abca3	59087	< 0.001	103147	< 0.001	102171	< 0.001
Galk1	58609	< 0.001	52572	< 0.001	103962	< 0.001
Atp11c	56408	< 0.001	3688	0.006	23344	< 0.001
1110002B05Rik	55948	< 0.001	59951	< 0.001	71303	< 0.001
Maged1	55760	< 0.001	58430	< 0.001	43763	< 0.001
Cul3	55147	< 0.001	52142	< 0.001	39227	< 0.001
Wfs1	54990	< 0.001	167331	< 0.001	99144	< 0.001
Rnf185	54966	< 0.001	107830	< 0.001	59032	< 0.001
Atg5	54776	< 0.001	22292	< 0.001	63366	< 0.001
Iqgap1	54613	< 0.001	54546	< 0.001	66475	< 0.001
Abi1	54569	< 0.001	82267	< 0.001	127525	< 0.001
Tpi1	54212	< 0.001	77906	< 0.001	70024	< 0.001
Aamp	53776	< 0.001	70788	< 0.001	61930	< 0.001
Phtf2	52925	< 0.001	20312	< 0.001	50509	< 0.001
Ngfrap1	52449	< 0.001	43949	< 0.001	81991	< 0.001
Pgam2	52363	< 0.001	56783	< 0.001	46024	< 0.001
Psmc3	52363	< 0.001	54940	< 0.001	72003	< 0.001
Elovl5	52110	< 0.001	99105	< 0.001	53830	< 0.001
Dcun1d5	51718	< 0.001	92394	< 0.001	75796	< 0.001
Dusp1	51592	< 0.001	67838	< 0.001	65349	< 0.001
Fbxw5	51363	< 0.001	25756	< 0.001	6709	< 0.001
H47	51357	< 0.001	63880	< 0.001	69729	< 0.001
Ldha	51353	< 0.001	70837	< 0.001	66583	< 0.001
Gm2a	51247	< 0.001	62570	< 0.001	55835	< 0.001
Pfn1	51236	< 0.001	70677	< 0.001	40067	< 0.001
Med30	51052	< 0.001	10184	< 0.001	28297	< 0.001
Sod2	50798	< 0.001	99972	< 0.001	133190	< 0.001
Fyb	50713	< 0.001	20562	< 0.001	57779	< 0.001
Lgals3	50349	< 0.001	69206	< 0.001	24481	< 0.001
Calu	50297	< 0.001	41272	< 0.001	56669	< 0.001
Ndufb10	50169	< 0.001	41689	< 0.001	47119	< 0.001
Psmb9	49948	< 0.001	48084	< 0.001	54521	< 0.001
Dnajc10	49808	< 0.001	43644	< 0.001	61799	< 0.001
Arhgdib	49598	< 0.001	36084	< 0.001	50651	< 0.001
5730469M10Rik	49212	< 0.001	15944	< 0.001	26489	< 0.001
Pygl	48366	< 0.001	41647	< 0.001	44969	< 0.001
Pecr	48266	< 0.001	61950	< 0.001	37589	< 0.001
Prdx5	48134	< 0.001	75716	< 0.001	72593	< 0.001
Spcs1	48033	< 0.001	60338	< 0.001	49339	< 0.001
Ndufv1	47952	< 0.001	76075	< 0.001	80875	< 0.001
Ogdh	47415	< 0.001	55910	< 0.001	53563	< 0.001
Gstt3	46955	< 0.001	11488	< 0.001	28380	< 0.001
Mgst2	46709	< 0.001	37653	< 0.001	31461	< 0.001
Rragc	46605	< 0.001	9128	< 0.001	40831	< 0.001
Ddit4	46089	< 0.001	113854	< 0.001	126280	< 0.001
Cyba	45981	< 0.001	20153	< 0.001	28551	< 0.001
Twf2	45837	< 0.001	30416	< 0.001	21096	< 0.001
Hmgn3	45407	< 0.001	28015	< 0.001	48491	< 0.001
Zbed3	45343	< 0.001	40131	< 0.001	62121	< 0.001
Edc4	45264	< 0.001	34676	< 0.001	24283	< 0.001
Ndufa5	44959	< 0.001	17899	< 0.001	11512	< 0.001
Insl6	44758	< 0.001	8625	< 0.001	27638	< 0.001
Renbp	44226	< 0.001	28869	< 0.001	64521	< 0.001
Cd177	44192	< 0.001	61636	< 0.001	47788	< 0.001
Rad21	44140	< 0.001	33868	< 0.001	56981	< 0.001
Pih1d1	44058	< 0.001	12350	< 0.001	15606	< 0.001
Idh2	43572	< 0.001	45562	< 0.001	93645	< 0.001
Aldh4a1	43565	< 0.001	9719	< 0.001	6148	< 0.001
Gpbp1	43276	< 0.001	44423	< 0.001	7169	< 0.001
Ttc3	43050	< 0.001	49129	< 0.001	32853	< 0.001
Gadd45g	42773	< 0.001	90261	< 0.001	8166	< 0.001
H2-DMb2	42438	< 0.001	32196	< 0.001	17930	< 0.001
Rars	42262	< 0.001	15109	< 0.001	36130	< 0.001
Tcp1	42241	< 0.001	38645	< 0.001	45094	< 0.001
Rsad2	42225	< 0.001	81506	< 0.001	4773	< 0.001
Pi16	41781	< 0.001	87065	< 0.001	46249	< 0.001
Parvg	41764	< 0.001	26965	< 0.001	22197	< 0.001
Aif1	41654	< 0.001	4120	< 0.001	30617	< 0.001
Capg	41611	< 0.001	20581	< 0.001	63755	< 0.001
Alox5ap	41244	< 0.001	73456	< 0.001	53949	< 0.001
Txnip	41221	< 0.001	51668	< 0.001	28215	< 0.001
Slc6a6	41214	< 0.001	21494	< 0.001	14711	< 0.001
Abcd3	41023	< 0.001	20986	< 0.001	28757	< 0.001
H2-Eb1	40070	< 0.001	49344	< 0.001	28831	< 0.001
Atf5	39783	< 0.001	82197	< 0.001	53085	< 0.001
Aldoa	39720	< 0.001	72155	< 0.001	67023	< 0.001
Sec13	39553	< 0.001	47957	< 0.001	34240	< 0.001
Acadvl	39369	< 0.001	29522	< 0.001	45064	< 0.001
Prkar1a	39313	< 0.001	41177	< 0.001	46501	< 0.001
Ranbp9	39056	< 0.001	13850	< 0.001	34949	< 0.001
Mapkap1	38848	< 0.001	23861	< 0.001	47963	< 0.001
Rsl1d1	38523	< 0.001	72586	< 0.001	52283	< 0.001
Myb	38224	< 0.001	27622	< 0.001	13723	< 0.001
Slc7a7	37851	< 0.001	20393	< 0.001	20102	< 0.001
Gpr18	37664	< 0.001	22883	< 0.001	45258	< 0.001
Tmem43	37645	< 0.001	72715	< 0.001	16674	< 0.001
Cdc42ep3	37479	< 0.001	27924	< 0.001	32055	< 0.001
Rabggtb	37447	< 0.001	49042	< 0.001	47167	< 0.001
Hdgf	37084	< 0.001	4761	< 0.001	29320	< 0.001
Gorasp2	37062	< 0.001	35123	< 0.001	20829	< 0.001
Sap30	36999	< 0.001	46713	< 0.001	33787	< 0.001
Atp1b1	36522	< 0.001	50976	< 0.001	63165	< 0.001
Fcrla	36382	< 0.001	36541	< 0.001	75815	< 0.001
Rnf19a	36303	< 0.001	51353	< 0.001	39100	< 0.001
Snx2	36183	< 0.001	7655	< 0.001	8503	< 0.001
Ccnk	35898	< 0.001	34776	< 0.001	12228	< 0.001
Thoc4	35883	< 0.001	65678	< 0.001	54287	< 0.001
Snx18	35749	< 0.001	58095	< 0.001	37152	< 0.001
Qars	35311	< 0.001	34237	< 0.001	45917	< 0.001
Atg16l1	34810	< 0.001	31001	< 0.001	21955	< 0.001
Nedd1	34750	< 0.001	59929	< 0.001	117665	< 0.001
1190002H23Rik	34550	< 0.001	31283	< 0.001	16417	< 0.001
Sla	34542	< 0.001	62750	< 0.001	58256	< 0.001
Pan3	34489	< 0.001	37100	< 0.001	31793	< 0.001
Top2b	34015	< 0.001	30110	< 0.001	50055	< 0.001
Mad2l1	33698	< 0.001	13162	< 0.001	5365	< 0.001
Uso1	33684	< 0.001	26777	< 0.001	11426	< 0.001
2610318N02Rik	33599	< 0.001	26420	< 0.001	4422	0.001
Cdc7	33148	< 0.001	10348	< 0.001	21348	< 0.001
Tpst2	33052	< 0.001	35089	< 0.001	37056	< 0.001
Tbc1d15	32924	< 0.001	11233	< 0.001	16618	< 0.001
Cacna1h	32842	< 0.001	131804	< 0.001	66046	< 0.001
Isg20l2	32775	< 0.001	44780	< 0.001	24680	< 0.001
Tpm1	32723	< 0.001	14421	< 0.001	11454	< 0.001
Trim25	32025	< 0.001	34397	< 0.001	31389	< 0.001
Reep5	31823	< 0.001	63379	< 0.001	50890	< 0.001
Xrcc6	31700	< 0.001	34089	< 0.001	33869	< 0.001
Hagh	31693	< 0.001	14200	< 0.001	9165	< 0.001
Hmha1	31669	< 0.001	41998	< 0.001	73681	< 0.001
Psmb8	31511	< 0.001	50372	< 0.001	37091	< 0.001
Dhrs7	31352	< 0.001	36636	< 0.001	53434	< 0.001
Ibsp	30912	< 0.001	46222	< 0.001	6962	< 0.001
Ptplad1	30810	< 0.001	24300	< 0.001	27217	< 0.001
Gnb1	30636	< 0.001	30197	< 0.001	13642	< 0.001
Sypl	30617	< 0.001	25358	< 0.001	41023	< 0.001
Ctcf	30342	< 0.001	37008	< 0.001	41644	< 0.001
Ap2m1	30203	< 0.001	57584	< 0.001	71362	< 0.001
Serinc1	30065	< 0.001	35687	< 0.001	51742	< 0.001
E2f1	30062	< 0.001	61557	< 0.001	27557	< 0.001
Pbk	29845	< 0.001	20656	< 0.001	22446	< 0.001
Itgb2	29798	< 0.001	43140	< 0.001	30539	< 0.001
Pdpk1	29769	< 0.001	36513	< 0.001	56555	< 0.001
Aspm	29602	< 0.001	43668	< 0.001	26776	< 0.001
Alas1	29175	< 0.001	38967	< 0.001	48992	< 0.001
Vars	28952	< 0.001	69530	< 0.001	39731	< 0.001
Ctss	28778	< 0.001	33252	< 0.001	38789	< 0.001
Hsd17b4	28583	< 0.001	32564	< 0.001	43516	< 0.001
Gtf3c2	28554	< 0.001	13666	< 0.001	12647	< 0.001
Phc2	28518	< 0.001	13542	< 0.001	3164	0.008
Gns	28407	< 0.001	41052	< 0.001	27867	< 0.001
Mns1	28314	< 0.001	32856	< 0.001	46551	< 0.001
Blvrb	28301	< 0.001	136451	< 0.001	17270	< 0.001
Ak2	28227	< 0.001	23498	< 0.001	20956	< 0.001
Acbd6	28135	< 0.001	33590	< 0.001	19283	< 0.001
Lmo4	28109	< 0.001	58288	< 0.001	82911	< 0.001
Gimap6	27710	< 0.001	30136	< 0.001	29912	< 0.001
Rasl11b	27610	< 0.001	58179	< 0.001	65290	< 0.001
Trim28	27524	< 0.001	42358	< 0.001	26709	< 0.001
Kpna3	27031	< 0.001	5963	< 0.001	6782	< 0.001
Polr2j	26961	< 0.001	41041	< 0.001	39683	< 0.001
Cog6	26956	< 0.001	22073	< 0.001	11523	< 0.001
Herpud2	26911	< 0.001	8117	< 0.001	6108	< 0.001
Lsm14a	26909	< 0.001	53360	< 0.001	35775	< 0.001
Gltp	26907	< 0.001	17772	< 0.001	13811	< 0.001
Psat1	26903	< 0.001	9611	< 0.001	20790	< 0.001
Rom1	26823	< 0.001	12560	< 0.001	22185	< 0.001
Aco2	26801	< 0.001	15776	< 0.001	19515	< 0.001
Phb2	26789	< 0.001	21167	< 0.001	55281	< 0.001
Mdh2	26620	< 0.001	34989	< 0.001	29819	< 0.001
Ppp2r2c	26530	< 0.001	26507	< 0.001	23758	< 0.001
S100a10	26080	< 0.001	32621	< 0.001	25436	< 0.001
Sbds	26072	< 0.001	12779	< 0.001	19952	< 0.001
Ctsk	26048	< 0.001	6405	< 0.001	6127	< 0.001
Gclm	26044	< 0.001	39565	< 0.001	20318	< 0.001
Pdcd2l	25903	< 0.001	13352	< 0.001	22298	< 0.001
C78339	25869	< 0.001	62733	< 0.001	10921	< 0.001
Adss	25862	< 0.001	17255	< 0.001	14529	< 0.001
Dnajc8	25496	< 0.001	53032	< 0.001	30105	< 0.001
Slc35b1	25366	< 0.001	26005	< 0.001	29504	< 0.001
Ncf1	25333	< 0.001	31559	< 0.001	21150	< 0.001
Me2	25206	< 0.001	56970	< 0.001	37198	< 0.001
H2-Q8	24956	< 0.001	58553	< 0.001	26880	< 0.001
Klf1	24935	< 0.001	43337	< 0.001	22939	< 0.001
Ifngr1	24890	< 0.001	8333	< 0.001	111188	< 0.001
D10Wsu102e	24820	< 0.001	34426	< 0.001	50143	< 0.001
Nup88	24768	< 0.001	11426	< 0.001	8652	< 0.001
Alas2	24330	< 0.001	60063	< 0.001	23805	< 0.001
H6pd	24312	< 0.001	14346	< 0.001	4089	0.003
Cenpa	24123	< 0.001	19000	< 0.001	91032	< 0.001
Asprv1	24088	< 0.001	29091	< 0.001	20730	< 0.001
Prkacb	23981	< 0.001	41508	< 0.001	55850	< 0.001
Ddx39	23953	< 0.001	19388	< 0.001	23528	< 0.001
Slc2a3	23782	< 0.001	34362	< 0.001	22690	< 0.001
Zfp655	23705	< 0.001	9398	< 0.001	5337	< 0.001
Ubash3b	23642	< 0.001	19691	< 0.001	14294	< 0.001
Ube4b	23348	< 0.001	27787	< 0.001	42156	< 0.001
F10	23291	< 0.001	133442	< 0.001	76628	< 0.001
Mllt3	23215	< 0.001	22356	< 0.001	49492	< 0.001
Bscl2	23151	< 0.001	31297	< 0.001	59219	< 0.001
Itpr2	23057	< 0.001	16307	< 0.001	11730	< 0.001
Tacc3	23010	< 0.001	17350	< 0.001	29768	< 0.001
Car2	22985	< 0.001	27686	< 0.001	12926	< 0.001
Emb	22958	< 0.001	13916	< 0.001	39535	< 0.001
Csrp2	22933	< 0.001	7561	< 0.001	50831	< 0.001
Dicer1	22789	< 0.001	5171	< 0.001	3103	0.009
Sepx1	22675	< 0.001	3905	0.003	25624	< 0.001
F9	22673	< 0.001	27427	< 0.001	59488	< 0.001
9530068E07Rik	22646	< 0.001	42188	< 0.001	42579	< 0.001
Ywhab	22610	< 0.001	25558	< 0.001	28231	< 0.001
Smn1	22575	< 0.001	36538	< 0.001	138945	< 0.001
Mrc1	22502	< 0.001	19288	< 0.001	22150	< 0.001
Cdt1	22398	< 0.001	20480	< 0.001	24360	< 0.001
Mmd	22394	< 0.001	35028	< 0.001	13161	< 0.001
Spast	22152	< 0.001	18933	< 0.001	18375	< 0.001
Prkab1	22026	< 0.001	20760	< 0.001	7603	< 0.001
Arf3	22023	< 0.001	68666	< 0.001	34925	< 0.001
Ggta1	21970	< 0.001	20528	< 0.001	18478	< 0.001
Wasl	21929	< 0.001	19957	< 0.001	13145	< 0.001
Cmas	21894	< 0.001	29146	< 0.001	32228	< 0.001
Siah1b	21866	< 0.001	31788	< 0.001	16432	< 0.001
Sptlc1	21821	< 0.001	17952	< 0.001	22871	< 0.001
Blcap	21717	< 0.001	5302	< 0.001	6165	< 0.001
Fbxw7	21706	< 0.001	35116	< 0.001	30272	< 0.001
Bag5	21648	< 0.001	11158	< 0.001	70268	< 0.001
Ifitm6	21589	< 0.001	14700	< 0.001	17411	< 0.001
Slc25a17	21532	< 0.001	15584	< 0.001	26294	< 0.001
Rac2	21467	< 0.001	71216	< 0.001	13290	< 0.001
Ube2t	21459	< 0.001	11280	< 0.001	27963	< 0.001
Ndufb5	21423	< 0.001	31165	< 0.001	24173	< 0.001
Vcam1	21314	< 0.001	13980	< 0.001	13537	< 0.001
Pqlc3	21287	< 0.001	14393	< 0.001	15653	< 0.001
Acbd5	21285	< 0.001	37477	< 0.001	37718	< 0.001
Axl	21260	< 0.001	11114	< 0.001	85330	< 0.001
Kif23	21226	< 0.001	7960	< 0.001	31925	< 0.001
Zfp91	21175	< 0.001	17388	< 0.001	17836	< 0.001
Cd3d	21120	< 0.001	4440	< 0.001	37041	< 0.001
Pom121	21034	< 0.001	21869	< 0.001	16525	< 0.001
Pdha1	20886	< 0.001	36791	< 0.001	30445	< 0.001
Cldn7	20514	< 0.001	29078	< 0.001	16963	< 0.001
Map2k1	20484	< 0.001	20356	< 0.001	25796	< 0.001
Ddx20	20457	< 0.001	35028	< 0.001	31936	< 0.001
Slc2a1	20364	< 0.001	23891	< 0.001	41263	< 0.001
Dnajb6	20263	< 0.001	25250	< 0.001	20411	< 0.001
Dhx16	20203	< 0.001	39384	< 0.001	11601	< 0.001
Rbm26	20092	< 0.001	29163	< 0.001	5964	< 0.001
Selplg	19931	< 0.001	23665	< 0.001	51750	< 0.001
Kbtbd7	19803	< 0.001	13607	< 0.001	11979	< 0.001
Glipr2	19622	< 0.001	41564	< 0.001	3590	0.005
Tpm4	19403	< 0.001	34114	< 0.001	20655	< 0.001
Ndufs7	19311	< 0.001	10551	< 0.001	16662	< 0.001
Lcp1	19259	< 0.001	8303	< 0.001	12398	< 0.001
Timm8b	19136	< 0.001	6878	< 0.001	34781	< 0.001
Smpdl3a	19046	< 0.001	6790	< 0.001	15565	< 0.001
Ctsg	19007	< 0.001	52190	< 0.001	39136	< 0.001
Abhd2	18906	< 0.001	46547	< 0.001	3612	0.005
4833439L19Rik	18894	< 0.001	40265	< 0.001	35551	< 0.001
Myo1g	18757	< 0.001	43255	< 0.001	62019	< 0.001
Plk1	18670	< 0.001	53113	< 0.001	43689	< 0.001
Mknk2	18615	< 0.001	24723	< 0.001	31169	< 0.001
Nin	18607	< 0.001	19917	< 0.001	11076	< 0.001
Zmynd19	18562	< 0.001	26117	< 0.001	14693	< 0.001
Mt1	18557	< 0.001	46464	< 0.001	120648	< 0.001
C8g	18526	< 0.001	6942	< 0.001	18058	< 0.001
Ccl5	18505	< 0.001	4517	< 0.001	10469	< 0.001
Fads1	18504	< 0.001	25514	< 0.001	25035	< 0.001
4833420G17Rik	18487	< 0.001	6168	< 0.001	11158	< 0.001
Itpr1	18485	< 0.001	53637	< 0.001	57486	< 0.001
Cisd1	18458	< 0.001	13870	< 0.001	3644	0.005
Zfyve21	18324	< 0.001	19214	< 0.001	30630	< 0.001
Timp2	18320	< 0.001	11610	< 0.001	6552	< 0.001
Ndufb9	18298	< 0.001	8005	< 0.001	11941	< 0.001
Ppp1r9b	18292	< 0.001	26897	< 0.001	17433	< 0.001
Dgka	18207	< 0.001	40382	< 0.001	16019	< 0.001
Sin3a	18178	< 0.001	53508	< 0.001	12844	< 0.001
Plek	18147	< 0.001	21994	< 0.001	28923	< 0.001
Nup107	18009	< 0.001	23065	< 0.001	29960	< 0.001
Syf2	17972	< 0.001	12183	< 0.001	14557	< 0.001
Impdh2	17721	< 0.001	17886	< 0.001	18197	< 0.001
Dnmt3b	17620	< 0.001	4874	< 0.001	8419	< 0.001
Cyfip2	17604	< 0.001	14590	< 0.001	13343	< 0.001
Ide	17559	< 0.001	69079	< 0.001	29391	< 0.001
Kl	17455	< 0.001	18151	< 0.001	14931	< 0.001
Nup62	17420	< 0.001	36307	< 0.001	19944	< 0.001
Gstm5	17384	< 0.001	17970	< 0.001	16984	< 0.001
Hibadh	17328	< 0.001	27163	< 0.001	49656	< 0.001
Katna1	17324	< 0.001	4868	< 0.001	8345	< 0.001
Icam1	17176	< 0.001	20924	< 0.001	30313	< 0.001
Sgpl1	17141	< 0.001	12036	< 0.001	16918	< 0.001
Elof1	17024	< 0.001	8057	< 0.001	15508	< 0.001
F2r	16999	< 0.001	32192	< 0.001	7312	< 0.001
Gabarapl1	16966	< 0.001	82196	< 0.001	23953	< 0.001
Ech1	16905	< 0.001	29798	< 0.001	21742	< 0.001
Mrpl2	16822	< 0.001	4114	< 0.001	29612	< 0.001
Ltv1	16782	< 0.001	9754	< 0.001	23716	< 0.001
Magoh	16603	< 0.001	10335	< 0.001	9140	< 0.001
Ep400	16592	< 0.001	12413	< 0.001	23549	< 0.001
Ube2b	16513	< 0.001	13183	< 0.001	14565	< 0.001
6330503K22Rik	16418	< 0.001	7551	< 0.001	8303	< 0.001
Eed	16362	< 0.001	32231	< 0.001	39313	< 0.001
Sgol1	16294	< 0.001	12439	< 0.001	21213	< 0.001
Epb4.1l2	16292	< 0.001	20181	< 0.001	5578	< 0.001
Mfge8	16245	< 0.001	39733	< 0.001	7271	< 0.001
Idh3b	16218	< 0.001	20497	< 0.001	11816	< 0.001
Eif1b	16192	< 0.001	16092	< 0.001	22976	< 0.001
Ccdc101	16142	< 0.001	13492	< 0.001	38193	< 0.001
Snx10	15786	< 0.001	15212	< 0.001	12569	< 0.001
Nfkbiz	15728	< 0.001	19242	< 0.001	29874	< 0.001
Mospd1	15725	< 0.001	47895	< 0.001	22365	< 0.001
Oma1	15653	< 0.001	14082	< 0.001	23031	< 0.001
Msn	15601	< 0.001	24865	< 0.001	19610	< 0.001
Coasy	15572	< 0.001	6112	< 0.001	21347	< 0.001
Ermp1	15519	< 0.001	7687	< 0.001	19548	< 0.001
Fli1	15364	< 0.001	8610	< 0.001	39446	< 0.001
Cd37	15280	< 0.001	26021	< 0.001	18991	< 0.001
Hvcn1	15278	< 0.001	28497	< 0.001	19100	< 0.001
Vamp2	15243	< 0.001	12314	< 0.001	34271	< 0.001
Rab3d	15240	< 0.001	25088	< 0.001	46161	< 0.001
C1galt1c1	15167	< 0.001	9785	< 0.001	12849	< 0.001
Cd93	15163	< 0.001	8122	< 0.001	31163	< 0.001
Wdr20a	15107	< 0.001	4850	< 0.001	17639	< 0.001
Aurka	14955	< 0.001	5749	< 0.001	14509	< 0.001
Rpa3	14929	< 0.001	16038	< 0.001	18417	< 0.001
S100a4	14815	< 0.001	21898	< 0.001	7949	< 0.001
Serpinb6b	14428	< 0.001	8999	< 0.001	13923	< 0.001
Pgs1	14402	< 0.001	30651	< 0.001	19215	< 0.001
Pnpla7	14398	< 0.001	21944	< 0.001	12203	< 0.001
Med26	14325	< 0.001	34269	< 0.001	8754	< 0.001
Elf1	14287	< 0.001	6150	< 0.001	9774	< 0.001
Egr1	14264	< 0.001	66110	< 0.001	26258	< 0.001
St3gal4	14222	< 0.001	33716	< 0.001	17057	< 0.001
Sirpa	14158	< 0.001	12975	< 0.001	30888	< 0.001
Scap	14130	< 0.001	8972	< 0.001	8578	< 0.001
Cnp	14020	< 0.001	23427	< 0.001	21629	< 0.001
Cdc42se2	13988	< 0.001	11064	< 0.001	17100	< 0.001
Crlf3	13931	< 0.001	9999	< 0.001	12687	< 0.001
Rtn4	13573	< 0.001	16195	< 0.001	14622	< 0.001
Tnfaip8	13540	< 0.001	12907	< 0.001	15567	< 0.001
Mia3	13527	< 0.001	20667	< 0.001	9887	< 0.001
Wdr5	13491	< 0.001	7112	< 0.001	7684	< 0.001
Cyc1	13447	< 0.001	8109	< 0.001	25292	< 0.001
Ccdc126	13423	< 0.001	47902	< 0.001	21749	< 0.001
Rora	13215	< 0.001	6973	< 0.001	22233	< 0.001
Coq9	13210	< 0.001	7494	< 0.001	6414	< 0.001
Rrbp1	13051	< 0.001	28566	< 0.001	7887	< 0.001
Fh1	12940	< 0.001	11672	< 0.001	7236	< 0.001
Fcnb	12917	< 0.001	33856	< 0.001	27749	< 0.001
Tbc1d8	12663	< 0.001	12333	< 0.001	10733	< 0.001
Isg20	12578	< 0.001	31102	< 0.001	14271	< 0.001
Csnk1g3	12577	< 0.001	43288	< 0.001	14199	< 0.001
Riok1	12535	< 0.001	22025	< 0.001	14018	< 0.001
Rtn3	12413	< 0.001	9568	< 0.001	6295	< 0.001
Bmi1	12322	< 0.001	16724	< 0.001	23282	< 0.001
Mphosph6	12227	< 0.001	14517	< 0.001	19284	< 0.001
Akap12	12003	< 0.001	3481	0.009	9114	< 0.001
Spib	11950	< 0.001	5436	< 0.001	14470	< 0.001
Fcgrt	11894	< 0.001	9050	< 0.001	5204	< 0.001
Arhgef6	11843	< 0.001	8610	< 0.001	7065	< 0.001
Apitd1	11727	< 0.001	35645	< 0.001	18426	< 0.001
Mmp8	11709	< 0.001	6244	< 0.001	4999	< 0.001
Gmds	11655	< 0.001	89422	< 0.001	8933	< 0.001
Nasp	11614	< 0.001	18193	< 0.001	27091	< 0.001
Lass2	11596	< 0.001	13237	< 0.001	8567	< 0.001
Dcp1a	11484	< 0.001	16303	< 0.001	4156	0.003
Timp3	11456	< 0.001	3614	0.006	9887	< 0.001
Med15	11374	< 0.001	21629	< 0.001	11419	< 0.001
Top2a	11370	< 0.001	3567	0.008	3806	0.004
Col11a1	11362	< 0.001	7529	< 0.001	3193	0.008
Stk17b	11356	< 0.001	11918	< 0.001	11839	< 0.001
Cdc5l	11336	< 0.001	16451	< 0.001	27993	< 0.001
Rif1	11133	< 0.001	18675	< 0.001	21160	< 0.001
Tspan14	11087	< 0.001	27498	< 0.001	11703	< 0.001
Pde4dip	11036	< 0.001	6802	< 0.001	3216	0.008
Fndc3b	10821	< 0.001	11465	< 0.001	12147	< 0.001
Fkbp4	10812	< 0.001	12464	< 0.001	19692	< 0.001
Cyb5b	10772	< 0.001	20955	< 0.001	18591	< 0.001
Vdac1	10757	< 0.001	16809	< 0.001	21263	< 0.001
Ets2	10755	< 0.001	24179	< 0.001	32438	< 0.001
Acbd3	10730	< 0.001	20883	< 0.001	13590	< 0.001
2810453I06Rik	10705	< 0.001	7841	< 0.001	9994	< 0.001
Dpp4	10677	< 0.001	5240	< 0.001	6103	< 0.001
Emp3	10611	< 0.001	15474	< 0.001	31275	< 0.001
Prtn3	10573	< 0.001	15640	< 0.001	7047	< 0.001
Prkce	10568	< 0.001	14523	< 0.001	3665	0.005
Mtf2	10565	< 0.001	7149	< 0.001	12195	< 0.001
Rraga	10493	< 0.001	11325	< 0.001	16618	< 0.001
Sfrs14	10446	< 0.001	23931	< 0.001	13683	< 0.001
Slc25a4	10391	< 0.001	9528	< 0.001	8309	< 0.001
Chi3l1	10364	< 0.001	17480	< 0.001	33869	< 0.001
Smyd1	10328	< 0.001	13496	< 0.001	8689	< 0.001
Tiam1	10300	< 0.001	3798	0.004	10115	< 0.001
Hck	10074	< 0.001	22144	< 0.001	3853	0.004
Nucb1	10045	< 0.001	12840	< 0.001	41543	< 0.001
Fah	9991	< 0.001	20657	< 0.001	6253	< 0.001
Pask	9985	< 0.001	4933	< 0.001	3250	0.006
Gnpda2	9952	< 0.001	6259	< 0.001	11988	< 0.001
Rag1	9885	< 0.001	3579	0.008	6849	< 0.001
Cdk8	9882	< 0.001	8559	< 0.001	8929	< 0.001
Med28	9879	< 0.001	23171	< 0.001	15217	< 0.001
Heatr5a	9777	< 0.001	14024	< 0.001	14149	< 0.001
Soat1	9682	< 0.001	13936	< 0.001	12293	< 0.001
Ier3	9659	< 0.001	18171	< 0.001	34472	< 0.001
Phospho2	9637	< 0.001	11496	< 0.001	11483	< 0.001
Mettl3	9545	< 0.001	8298	< 0.001	12125	< 0.001
Rhd	9340	< 0.001	15284	< 0.001	6642	< 0.001
Crem	9298	< 0.001	15881	< 0.001	3639	0.005
Kcnn4	9179	< 0.001	9619	< 0.001	9633	< 0.001
Oxct1	9123	< 0.001	10715	< 0.001	5011	< 0.001
Nudt4	9066	< 0.001	13308	< 0.001	18110	< 0.001
Pold3	9041	< 0.001	14260	< 0.001	15134	< 0.001
Cib1	8986	< 0.001	7047	< 0.001	3462	0.006
Anxa4	8984	< 0.001	6339	< 0.001	7647	< 0.001
Pkp3	8892	< 0.001	66708	< 0.001	20864	< 0.001
Lrmp	8842	< 0.001	5946	< 0.001	8144	< 0.001
Nup160	8668	< 0.001	5616	< 0.001	8309	< 0.001
Pygb	8660	< 0.001	16896	< 0.001	17996	< 0.001
Dhdh	8617	< 0.001	32869	< 0.001	56542	< 0.001
Aldh3a2	8519	< 0.001	37748	< 0.001	13865	< 0.001
Sh3bgrl	8375	< 0.001	4995	< 0.001	17326	< 0.001
Ppp3r1	8361	< 0.001	3708	0.006	11275	< 0.001
Dpy30	8314	< 0.001	5315	< 0.001	12137	< 0.001
Mgll	8296	< 0.001	5883	< 0.001	4583	< 0.001
Smc3	8278	< 0.001	10462	< 0.001	11018	< 0.001
Vcl	8230	< 0.001	12658	< 0.001	14374	< 0.001
Mcm6	8180	< 0.001	5079	< 0.001	11746	< 0.001
Pgrmc1	8070	< 0.001	12087	< 0.001	12130	< 0.001
Ltf	8044	< 0.001	12977	< 0.001	11874	< 0.001
Ccl9	7986	< 0.001	32567	< 0.001	17720	< 0.001
Ebf2	7933	< 0.001	10543	< 0.001	9185	< 0.001
Apoe	7882	< 0.001	5834	< 0.001	4127	0.003
Mbtd1	7861	< 0.001	14130	< 0.001	3502	0.005
Id2	7781	< 0.001	21017	< 0.001	6899	< 0.001
Aqp9	7771	< 0.001	11579	< 0.001	29175	< 0.001
Bub1b	7763	< 0.001	14876	< 0.001	5332	< 0.001
Gsg2	7751	< 0.001	12025	< 0.001	13425	< 0.001
Lgals9	7669	< 0.001	42509	< 0.001	15272	< 0.001
Bcat1	7584	< 0.001	24814	< 0.001	12544	< 0.001
Ndfip2	7486	< 0.001	54096	< 0.001	41315	< 0.001
Il2rg	7485	< 0.001	9798	< 0.001	9454	< 0.001
Ethe1	7458	< 0.001	28974	< 0.001	19294	< 0.001
Arfgap3	7396	0.001	27086	< 0.001	20787	< 0.001
Alg2	7395	0.001	18899	< 0.001	22835	< 0.001
Cbfb	7381	0.001	10323	< 0.001	4592	< 0.001
Nsun4	7333	0.001	19261	< 0.001	16186	< 0.001
Ezh2	7294	0.001	8598	< 0.001	6423	< 0.001
Cyb5r3	7178	0.001	19447	< 0.001	15734	< 0.001
2610027L16Rik	7158	0.001	12339	< 0.001	7762	< 0.001
Top1	7135	0.001	17492	< 0.001	13373	< 0.001
Slc15a4	7036	0.001	15720	< 0.001	10828	< 0.001
Cdk2ap2	6998	0.001	52763	< 0.001	15712	< 0.001
Ywhag	6913	0.001	25526	< 0.001	16679	< 0.001
Cd68	6750	0.001	11878	< 0.001	12123	< 0.001
Dnalc4	6724	0.001	3721	0.006	3224	0.008
Dgat1	6701	0.001	10167	< 0.001	5038	< 0.001
Prdx2	6604	0.001	47654	< 0.001	40427	< 0.001
Slc4a2	6601	0.001	8371	< 0.001	6951	< 0.001
Rbm18	6599	0.001	9937	< 0.001	11760	< 0.001
P2ry10	6596	0.001	5319	< 0.001	4492	0.001
2900010M23Rik	6563	0.001	4376	< 0.001	16964	< 0.001
Mum1	6531	0.001	24444	< 0.001	9123	< 0.001
Farsb	6527	0.001	18670	< 0.001	13887	< 0.001
D11Wsu47e	6415	0.001	77368	< 0.001	8151	< 0.001
Thbd	6413	0.001	5006	< 0.001	11457	< 0.001
Nubp2	6405	0.001	17977	< 0.001	21830	< 0.001
Tpx2	6366	0.001	4593	< 0.001	10048	< 0.001
Magee1	6355	0.001	8223	< 0.001	19279	< 0.001
Fos	6347	0.001	9149	< 0.001	26395	< 0.001
Akap10	6318	0.001	7313	< 0.001	4477	0.001
Vps26a	6317	0.001	5351	< 0.001	7947	< 0.001
Nfya	6213	0.001	13795	< 0.001	7413	< 0.001
Adi1	6194	0.001	14575	< 0.001	29189	< 0.001
Ermap	6085	0.001	5580	< 0.001	5856	< 0.001
Ift140	6002	0.001	14227	< 0.001	3818	0.004
Sqrdl	5998	0.001	9273	< 0.001	4997	< 0.001
rp9	5986	0.001	22906	< 0.001	13488	< 0.001
Ets1	5847	0.001	17996	< 0.001	19140	< 0.001
Atp2a2	5829	0.001	6126	< 0.001	4577	< 0.001
Dnahc8	5823	0.001	3592	0.006	4129	0.003
Ubl7	5788	0.001	19477	< 0.001	5174	< 0.001
Ctps	5655	0.001	3565	0.008	11339	< 0.001
Rad51	5557	0.001	101131	< 0.001	20250	< 0.001
Prps2	5556	0.001	7037	< 0.001	6993	< 0.001
Larp4	5555	0.001	5541	< 0.001	10045	< 0.001
Med31	5507	0.001	6224	< 0.001	12887	< 0.001
Sash1	5493	0.001	7432	< 0.001	6399	< 0.001
Orm1	5486	0.001	16345	< 0.001	10742	< 0.001
Ssfa2	5447	0.001	5567	< 0.001	3726	0.004
Slc1a6	5408	0.001	5447	< 0.001	4644	< 0.001
Gaa	5340	0.001	9069	< 0.001	16308	< 0.001
Acp5	5236	0.001	4909	< 0.001	3696	0.005
Faim2	5219	0.001	4049	0.003	3389	0.006
Psmd8	5174	0.001	7429	< 0.001	3097	0.009
Zfand2a	5154	0.001	11301	< 0.001	3822	0.004
Surf4	5140	0.001	12836	< 0.001	9132	< 0.001
Csda	5028	0.001	8692	< 0.001	4367	0.001
Tmbim1	5005	0.001	7765	< 0.001	17467	< 0.001
Syce2	4928	0.001	5075	< 0.001	5474	< 0.001
Mea1	4843	0.001	8565	< 0.001	7558	< 0.001
Ryr1	4813	0.001	7412	< 0.001	9180	< 0.001
Pole4	4747	0.003	4710	< 0.001	4371	0.001
Rilpl1	4674	0.003	10358	< 0.001	10927	< 0.001
Psma6	4649	0.003	5887	< 0.001	6601	< 0.001
Dock11	4530	0.003	7249	< 0.001	9190	< 0.001
Oxt	4526	0.003	4763	< 0.001	4418	0.001
Adamtsl4	4511	0.003	8596	< 0.001	4384	0.001
Hadhb	4401	0.003	13929	< 0.001	19554	< 0.001
Acot9	4397	0.003	5807	< 0.001	4567	< 0.001
Cnga1	4358	0.003	3630	0.006	4011	0.003
Inpp5a	4355	0.003	7920	< 0.001	6982	< 0.001
Fdx1	4305	0.004	7899	< 0.001	8832	< 0.001
Supv3l1	4303	0.004	5820	< 0.001	6034	< 0.001
Smad3	4282	0.004	5052	< 0.001	3447	0.006
Pgm2l1	4260	0.004	6913	< 0.001	10010	< 0.001
Elmod2	4251	0.004	3645	0.006	3339	0.006
Nrarp	4250	0.004	7412	< 0.001	5007	< 0.001
Bat3	4239	0.004	8355	< 0.001	5880	< 0.001
Cnot6l	4200	0.004	4081	0.003	5544	< 0.001
Bcap29	4170	0.004	5036	< 0.001	13151	< 0.001
2810417H13Rik	4125	0.004	13939	< 0.001	8952	< 0.001
Abcd2	4091	0.004	9129	< 0.001	3339	0.006
Peci	4085	0.004	7326	< 0.001	8695	< 0.001
Hmox2	4063	0.004	43908	< 0.001	3859	0.004
Gmnn	4047	0.004	4129	< 0.001	6232	< 0.001
Golph3l	3941	0.004	6272	< 0.001	4455	0.001
Pafah1b1	3919	0.004	3858	0.003	4775	< 0.001
Exosc5	3841	0.004	8010	< 0.001	5962	< 0.001
Cul1	3777	0.004	3677	0.006	8597	< 0.001
Pepd	3771	0.004	22599	< 0.001	3173	0.008
Golm1	3707	0.005	22069	< 0.001	36479	< 0.001
Unc119	3701	0.005	3493	0.009	4649	< 0.001
Casp7	3621	0.006	4114	< 0.001	10804	< 0.001
Alox12b	3611	0.008	3635	0.006	3716	0.004
Acyp2	3544	0.008	3363	0.009	5412	< 0.001
Tuba3b	3479	0.008	4263	< 0.001	5069	< 0.001
Rdx	3469	0.008	7794	< 0.001	3883	0.004
Pgm2	3385	0.008	12345	< 0.001	11472	< 0.001
C8b	3375	0.008	3559	0.008	3917	0.004
Mt2	3370	0.008	15683	< 0.001	5543	< 0.001
Piwil1	3290	0.009	3413	0.009	3625	0.005
Slc39a4	3245	0.009	3743	0.005	4837	< 0.001
Trappc3	3241	0.009	10663	< 0.001	3338	0.006
Rab32	3182	0.009	45273	< 0.001	40551	< 0.001
Tm9sf2	3164	0.009	13445	< 0.001	17667	< 0.001
